# Supplementary material for: Transcriptional determinants of lipid mobilization in human adipocytes
Source: PubMed Central journal article supplement — Sci Adv. 2024 Jan 3;10(1):eadi2689. doi: 10.1126/sciadv.adi2689 (PMC10776019; doi:10.1126/sciadv.adi2689), 2024-01-03
Supplement: sciadv.adi2689_sm.pdf [file sciadv.adi2689_sm.pdf]

Supplementary Materials for  
**Transcriptional determinants of lipid mobilization in human adipocytes**

Alison C. Ludzki *et al.*

Corresponding author: Mikael Rydén, [mikael.ryden@ki.se](mailto:mikael.ryden@ki.se); Niklas Mejhert, [niklas.mejhert@ki.se](mailto:niklas.mejhert@ki.se)

*Sci. Adv.* **10**, eadi2689 (2024)  
DOI: 10.1126/sciadv.adi2689

**This PDF file includes:**

Figs. S1 to S5  
Tables S1 to S4

**Fig. S1.**

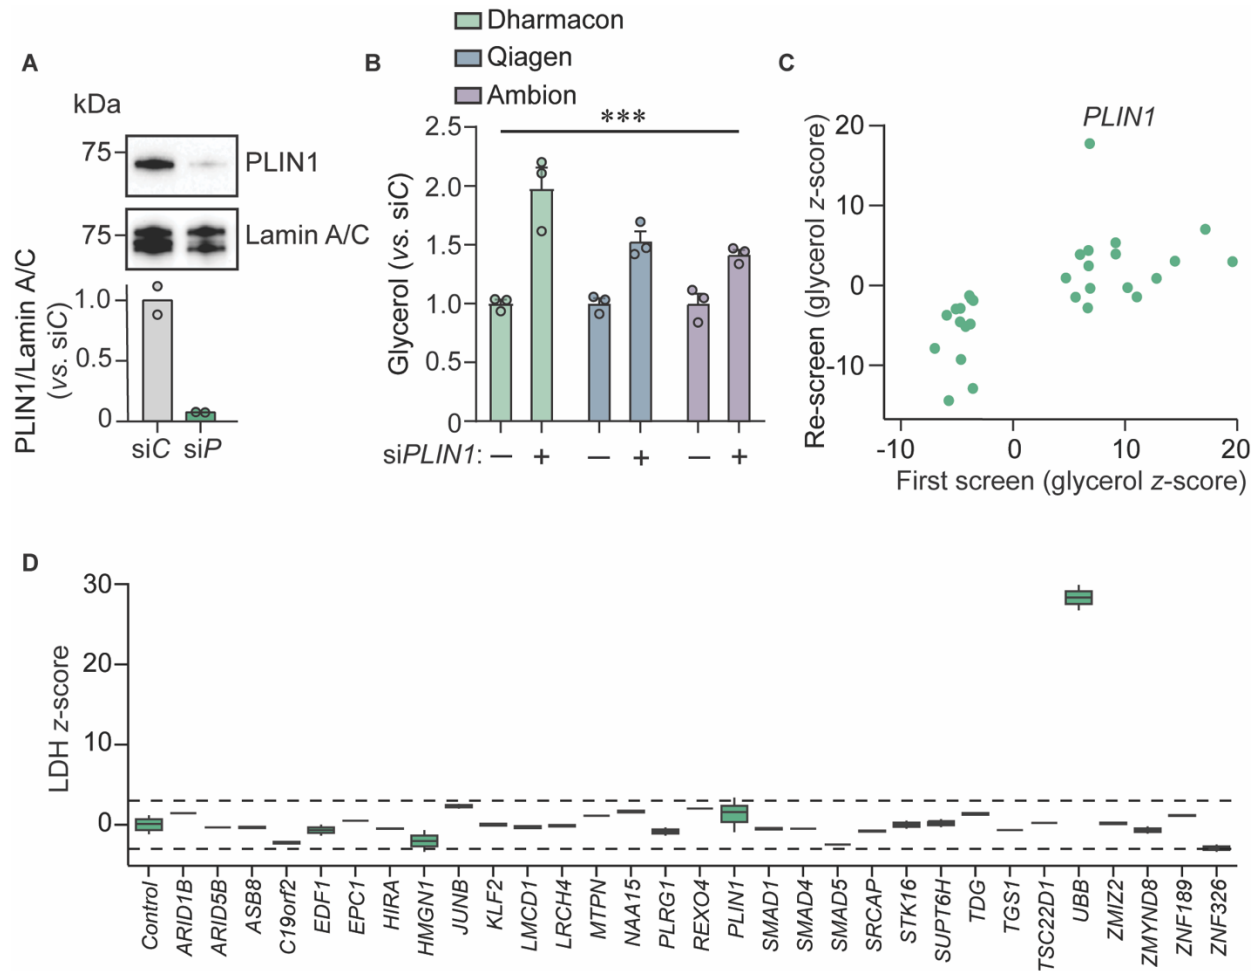

**Fig. S1. Validation of the adipocyte screening system.** (A) Representative Western blots of PLIN1 and Lamin A/C protein content for differentiated adipocytes transfected with non-targeting control (siC) or *PLIN1* siRNA (siP) (n = 2). (B) Glycerol release from siP vs. siC cells. \*\*\* $P < 0.001$  for a main effect for siRNA from a two-way ANOVA (n = 3). Bar plots in panel B are presented as mean  $\pm$  SEM. (C) Hits from the siRNA screen were re-screened on a separate adipose tissue biopsy (“Re-screen”). (D) LDH activity z-scores for screen hits. The dashed line marks a z-score  $\pm 3$ .

**Fig. S2.**

**A**

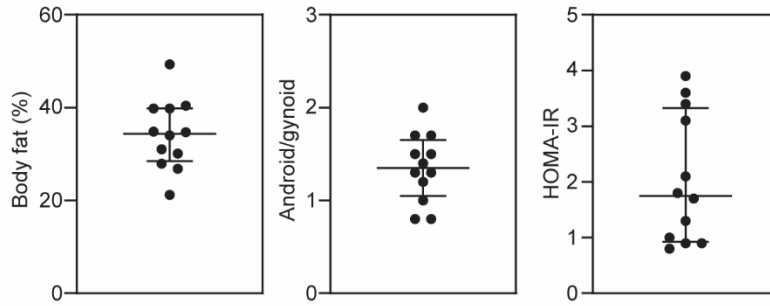

**B**

Waist-to-hip ratio

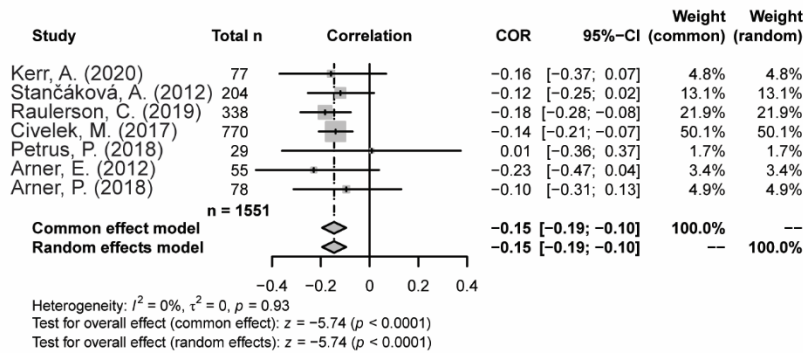

HOMA-IR

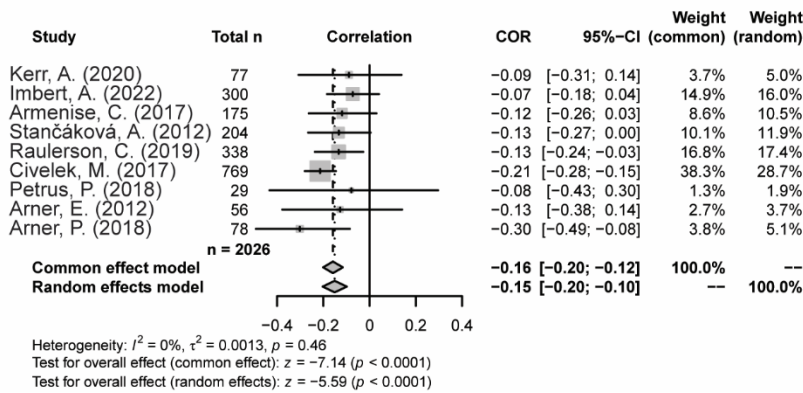

**Fig. S2. Clinical parameters. (A)** Subject characteristics for the clinical cohort for lipolysis measurements with median and interquartile range ( $n = 12$ ). **(B)** Forest plot displaying correlations and effects for meta-analysis of *ZNF189* expression in subcutaneous adipose tissue from 7-9 published human cohorts.

**Fig. S3.**

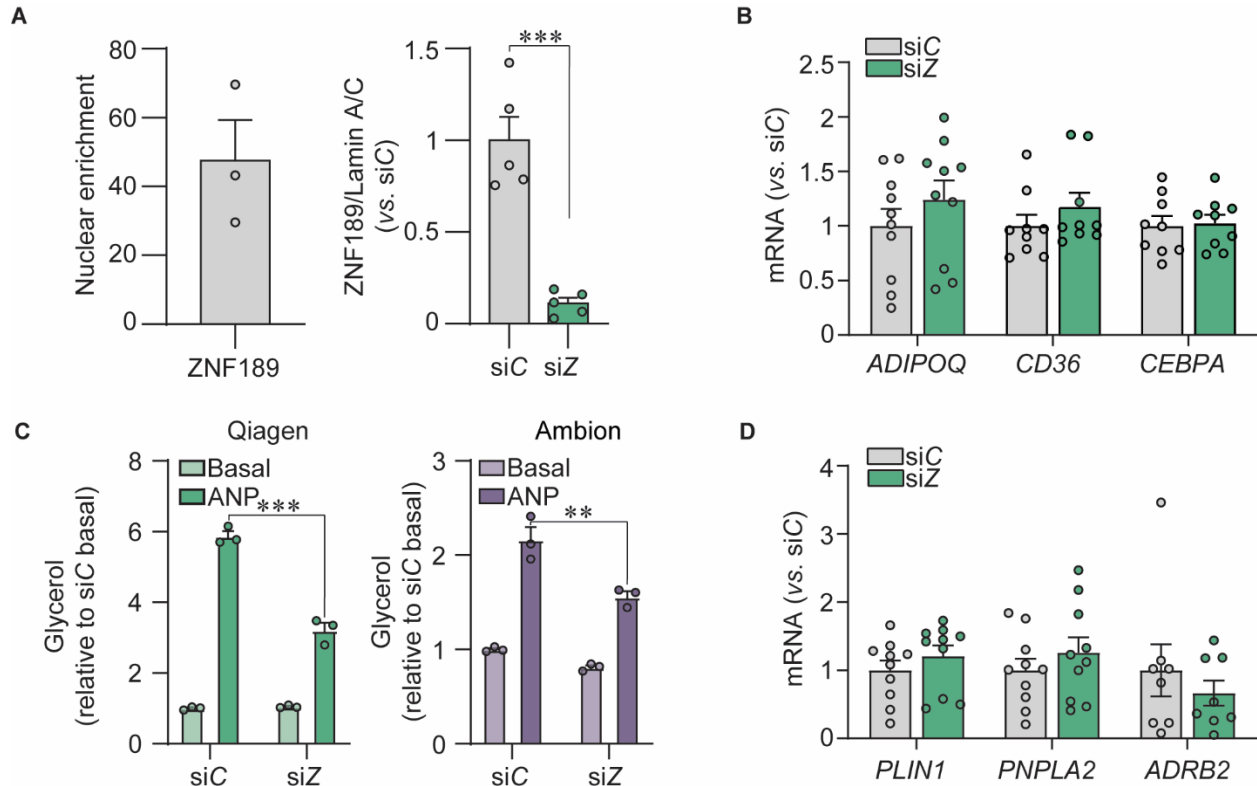

**Fig. S3. Quality control of the *ZNF189* knockdown in fat cells.** (A) Quantitation of the Western blots presented in Figure 3A-B. *Nuclear* enrichment is calculated vs. cytosolic fraction. (B) Gene expression of adipocyte marker genes. (C) Stimulated lipolysis validation experiments for *ZNF189* depletion using siRNA from two independent vendors. (D) Gene expression of lipolytic regulator genes. *siC* = control cells, *siZ* = *ZNF189* depleted cells. Data are mean  $\pm$  SEM. In all panels, replicates are highlighted by dots and are based on at least three independent experiments.  $**P < 0.01$ ,  $***P < 0.001$  for Welch's t-test assuming unequal variance (A), or Tukey's multiple comparison's (C).

**Fig. S4.**

**A**

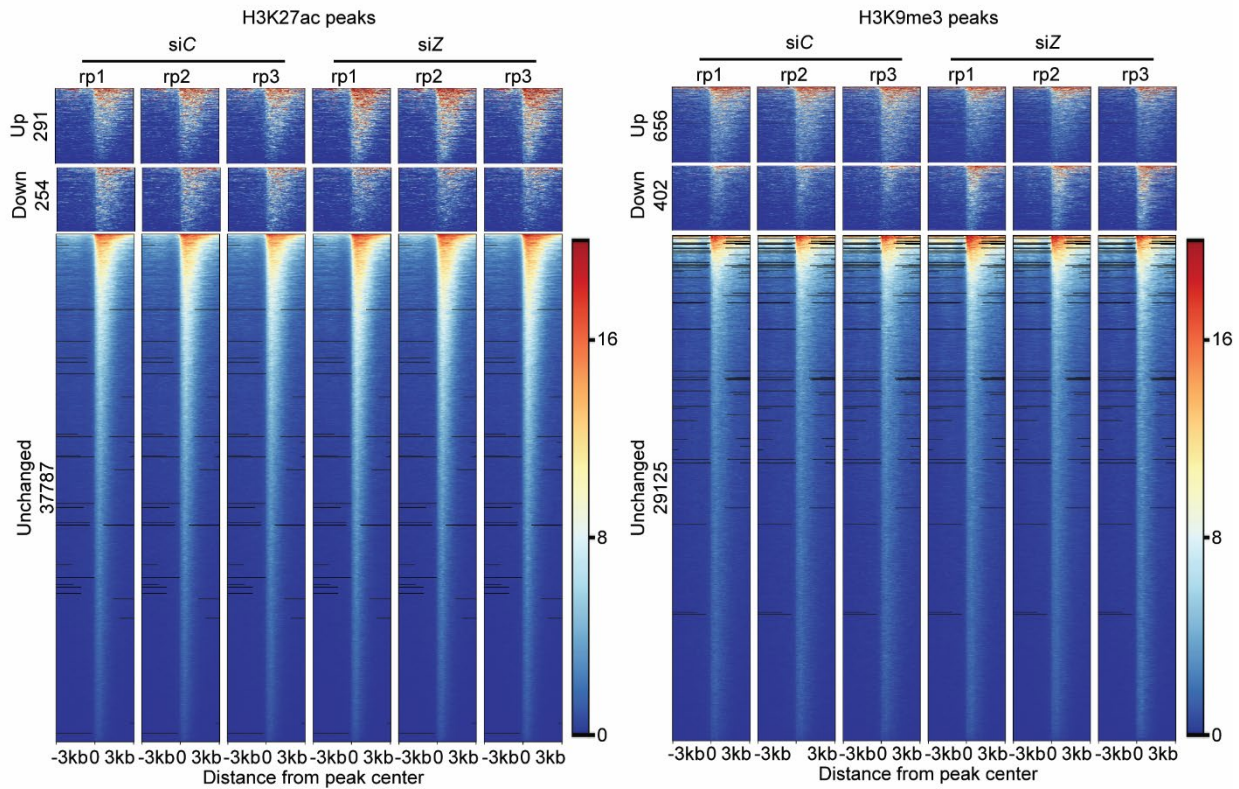

**B**

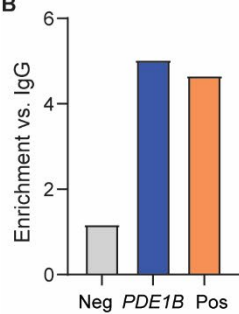

**Fig. S4. Quality control of the functional genomics assays. (A)** Heatmap for CUT&Tag peaks from siControl (siC) and siZNF189 (siZ) cells analyzed by edgeR with an adjusted  $P$  value  $< 0.05$  set as the threshold for up- and down-regulated peaks ( $n = 3$ ). **(B)** ChIP qPCR validation of the ChIP sequencing experiment ( $n = 1$ ). Neg = negative control locus, 3kb downstream of ZNF189 ChIPseq *PDE1B* peak. Pos = positive control region from the ZNF189 ChIPseq.

**Fig. S5.**

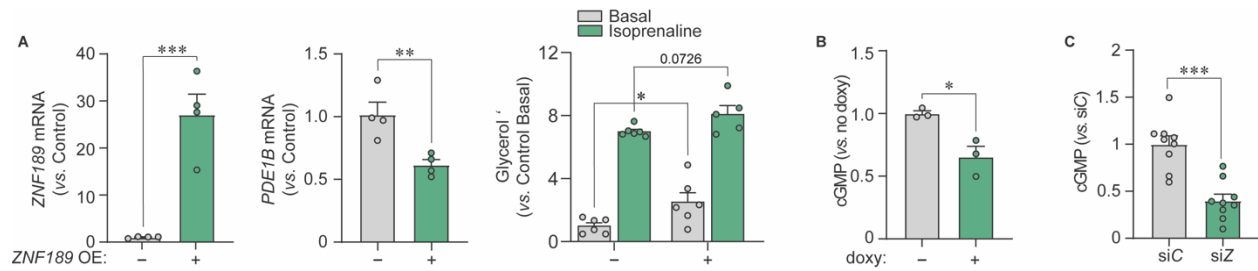

**Fig. S5. *PDE1B* regulation in human adipocytes.** (A) Gene expression (left and middle plots) and glycerol release (right plot) measures from control cells and *ZNF189* overexpressing (OE) adipocytes. Glycerol release was measured over three hours under basal (non-stimulated) conditions as well as following incubation with isoprenaline. (B) cGMP levels in cells overexpressing *PDE1B2* under a doxycycline (doxy)-inducible promoter. (C) cGMP levels in adipocytes treated with nontargeting control (siC) or *ZNF189* siRNA (siZ). Isoprenaline concentrations were 1-10 $\mu$ M. Data are mean  $\pm$  SEM. In all panels, replicates are highlighted by dots and are based on at least three independent experiments. \* $P < 0.05$ , \*\* $P < 0.01$ , \*\*\* $P < 0.001$  for a one-tailed (A) or two-tailed (B) t-test. Glycerol data in (A) were analyzed by two-way ANOVA, results from post-hoc statistical analyses are indicated.

**Table S1.**

| <b>Parameter 1</b> | <b>Parameter 2</b> | <b>r</b> | <b>P</b>  |
|--------------------|--------------------|----------|-----------|
| Replicate 1        | Replicate 2        | 0.88     | 1.16E-243 |
| Replicate 1        | Replicate 3        | 0.89     | 7.15E-250 |
| Replicate 2        | Replicate 3        | 0.89     | 8.43E-251 |

Pearson correlation statistics for lipolysis screen replicates.

**Table S2.**

| <b>Gene ID</b> | <b>Glycerol (z-score)</b> | <b>Adj. <i>P</i></b> |
|----------------|---------------------------|----------------------|
| <i>UBB</i>     | 25.48                     | 1.00E-13             |
| <i>STK16</i>   | 19.59                     | 1.00E-13             |
| <i>NAA15</i>   | 17.16                     | 1.00E-13             |
| <i>PLRG1</i>   | 14.45                     | 1.00E-13             |
| <i>SUPT6H</i>  | 12.80                     | 1.00E-13             |
| <i>KLF2</i>    | 11.05                     | 1.00E-13             |
| <i>LRCH4</i>   | 10.22                     | 1.00E-13             |
| <i>ARID5B</i>  | 9.26                      | 1.00E-13             |
| <i>ZMIZ2</i>   | 9.16                      | 1.00E-13             |
| <i>ARID1B</i>  | 9.15                      | 1.00E-13             |
| <i>KLF7</i>    | 7.03                      | 1.07E-05             |
| <i>JUNB</i>    | 6.89                      | 2.05E-13             |
| <i>PLIN1</i>   | 6.85                      | 1.00E-13             |
| <i>MTPN</i>    | 6.74                      | 1.61E-11             |
| <i>HMGNI</i>   | 6.73                      | 2.52E-11             |
| <i>SMAD4</i>   | 6.67                      | 1.27E-10             |
| <i>TGSI</i>    | 5.98                      | 9.28E-08             |
| <i>ASB8</i>    | 5.58                      | 1.45E-10             |
| <i>JUN</i>     | 4.90                      | 2.74E-05             |
| <i>EPC1</i>    | 4.72                      | 1.13E-05             |
| <i>TCERG1</i>  | 4.69                      | 1.70E-05             |
| <i>CLPB</i>    | 4.51                      | 5.66E-05             |
| <i>ANKRD54</i> | 4.26                      | 9.67E-09             |
| <i>PTRF</i>    | 4.23                      | 3.72E-05             |
| <i>HDAC7</i>   | 2.07                      | 4.26E-05             |
| <i>TDG</i>     | -3.54                     | 1.35E-02             |
| <i>ZMYND8</i>  | -3.58                     | 6.51E-04             |
| <i>HIRA</i>    | -3.73                     | 4.03E-02             |
| <i>REXO4</i>   | -3.81                     | 1.77E-05             |
| <i>SRCAP</i>   | -3.89                     | 7.99E-04             |
| <i>LASS4</i>   | -4.01                     | 2.37E-02             |
| <i>C19orf2</i> | -4.23                     | 9.80E-04             |
| <i>ZNF326</i>  | -4.64                     | 1.44E-02             |
| <i>EDF1</i>    | -4.70                     | 9.35E-04             |
| <i>TSC22D1</i> | -4.72                     | 3.13E-04             |
| <i>ZNF189</i>  | -5.09                     | 2.12E-05             |
| <i>SMAD5</i>   | -5.73                     | 2.34E-12             |
| <i>LMCD1</i>   | -5.92                     | 2.85E-04             |
| <i>SMADI</i>   | -6.98                     | 1.61E-09             |

Lipid mobilization screen hits. Adj. *P* from Dunnett's *posthoc* test after a One-way ANOVA.



**Table S3.**

| <b>Protein</b> | <b>Normalized intensity<br/>(median)</b> | <b>Enrichment<br/>(intensity in ZNF189<br/>IP/intensity in IgG)</b> |
|----------------|------------------------------------------|---------------------------------------------------------------------|
| ZNF189         | 3.97                                     | 15.67                                                               |
| SUMO2          | 2.94                                     | 7.13                                                                |
| CCAR2          | 2.00                                     | 4.01                                                                |
| XRCC6          | 1.75                                     | 5.94                                                                |
| TRIM28         | 1.63                                     | 6.00                                                                |
| ZMYM4          | 1.52                                     | 2.86                                                                |
| SUMO1          | 1.29                                     | 3.08                                                                |
| GTF2I          | 1.01                                     | 2.02                                                                |
| AHNAK          | 0.85                                     | 16.37                                                               |
| ALDH18A1       | 0.69                                     | 1.61                                                                |
| ADNP           | 0.67                                     | 1.59                                                                |
| SLC25A3        | 0.38                                     | 1.30                                                                |
| ZBED3          | 0.29                                     | 1.22                                                                |
| EML1           | -0.27                                    | 0.83                                                                |
| SAMHD1         | -0.28                                    | 3.14                                                                |
| PC             | -0.45                                    | 6.26                                                                |
| RPL7           | -0.61                                    | 4.44                                                                |
| BLMH           | -2.63                                    | 0.16                                                                |

ZNF189 interacting proteins identified by Immunoprecipitation-Mass Spectrometry. Interacting proteins were selected after quantification by filtering to include proteins with no detection in IgG samples or enrichment (fold change *versus* IgG) > 3 (n = 4).

**Table S4.**

| <b>Gene</b>                | <b>Forward primer (5'-3')</b> | <b>Reverse primer (5'-3')</b> |
|----------------------------|-------------------------------|-------------------------------|
| <i>18S</i>                 | TGACTCAACACGGGAAACC           | TCGCTCCACCAACTAAGAAC          |
| <i>ADIPOQ</i>              | GGTCTCGAACTCCTGGCCTA          | TGAGATATCGACTGGGCATGGT        |
| <i>ANKRD54</i>             | AGATCATCCAT ATGCTGAGG         | TCTTTGGTACTGGTCATCTG          |
| <i>ARID1B</i>              | ATGGAACTAGATCTCAACCTC         | CTGGTAAACTTGATGGTCTTTC        |
| <i>ASB8</i>                | TTCTAGTCCGGTAAACAGAG          | CTCCAAACTGCCGAATTG            |
| <i>B2M</i>                 | AAGGACTGGTCTTTCTATCTC         | GATCCCCTTAACTATCTTGG          |
| <i>CEBPA</i>               | CCCGGCAACTCTAGTATTTAG         | AAATGACAAGGCACGATTG           |
| <i>CD36</i>                | CAAGTTGTCCTCGAAGAAGG          | CATCATCACTTCCTGTGGATT         |
| <i>EDF1</i>                | CATTCTATTACCAAGAACACGG        | TGGCTTCTCATTGATTTTCG          |
| <i>EPC1</i>                | CAAAGTCTTACCATCGTCTG          | TTTCTACGGAAAGCAAAAG           |
| <i>HIRA</i>                | AGGAAGTGATATGACGGTATC         | GTGGAAAGTGACGGATTAAG          |
| <i>JUN</i>                 | AAAGGATAGTGCATGTTTC           | TAAAATCTGCCACCAATTCC          |
| <i>JUNB</i>                | TACTGTGGAAAAGAAACACG          | GAACAAACACACACAAACAC          |
| <i>KLF2</i>                | AAGGGCCTT AATTTGTACTG         | ATAAAAACGAACCAGGTAGC          |
| <i>KLF7</i>                | AAAACAAGAAGAGGGTTCAC          | ACTTATAAGGCTTCTCACCTG         |
| <i>LMCD1</i>               | TGTCAAGCAATATAAGAGCG          | CAGACGTATTCCACTTCTTTG         |
| <i>LRCH4</i>               | ATTTTCAGAGCTGTCATTCC          | CTGTTCGATGAAGTCAATCTG         |
| <i>LRP10</i>               | GATGGAGGCTGAGATTGTG           | GAGTCATATCCTGGCGTAAG          |
| <i>NAA15</i>               | AAGGATGAATTTAGCAAGG           | CCACCTTTTCTTTGTCTTTG          |
| Neg ctrl-ChIP qPCR         | CAACCTGACTGAGATGGATGAG        | AAGCTCCCTAACAGAGGAAATG        |
| <i>PDE1B1</i>              | GTCCTCCGGAGATGCTG             | AGCAAGAAGATGTGGATTAAGC        |
| <i>PDE1B</i> -all variants | CTTCAAGATTCCCCTGTGTTT         | GAATCCTTACCACAACCAGATC        |
| <i>PDE1B</i> -ChIP qPCR    | CTTTCTGCTGACATACTCAACC        | GGGATCTGCAATCTCTTAGATG        |
| <i>PLRG1</i>               | ACTATAAAGATCTGGGACTTGG        | CAGCATTTCCTTGTGTTGTC          |
| Pos ctrl-ChIP qPCR         | AGTCCAGCTCTCTTTGCCTC          | GCAGTTCTGAGACGTTTAAGCA        |
| <i>PPIA</i>                | CCCACCGTGTTCTTCGACATT         | GGACCCGTATGCTTTAGGATGA        |
| <i>PTRF</i>                | TCATGATCTACCAGGATGAAG         | TCCTCAATAACCTCCTCAAC          |
| <i>REXO4</i>               | TGAAGTTGTTGAGAAGGAAG          | GTACCTTTAGGTCATTATGCAG        |
| <i>SMAD1</i>               | GGCATATTGAAAAGGAGTTC          | AGATGCTACTGTCCTAAGG           |
| <i>SMAD5</i>               | CCAGTCTTACCTCCAGTATTAG        | TCCTAAACTGAACCAGAAGG          |
| <i>SRCAP</i>               | CATCTCATGATAGTGACACC          | CTTTATCTCCAACACCTGAG          |
| <i>STK16</i>               | GAATGAGATAGAAAGGCTGAAG        | ACCCAAGTCCATTAAACTG           |
| <i>SUPT6H</i>              | GAACTAGAAGAAGAAGCTGAC         | CACCTCAAAATGCTGATTTC          |
| <i>TCERG1</i>              | AGAGGAGATGACTGAAGAAG          | CCATGGAGTACCAGGAATAG          |
| <i>TDG</i>                 | TCAAATGGGCTAATTGAGAG          | TAAGCATGGCTTTCTTCTTC          |
| <i>TGS1</i>                | GAACAAAAAGGTGAATGGTC          | TCTCTGTCCAACCTTAATCCC         |
| <i>UBB</i>                 | CCGCTAACAGGTCAAAATG           | TAGTCAGAAAGAGTACGGC           |
| <i>UR11</i>                | CTTGATAGTAAGCCTGATACTG        | GTGTTACGATCTTCTTTTCC          |
| <i>ZMIZ2</i>               | AGGAATGACACCCTTGTATG          | ATACACCTCAGAGTAGGTTC          |
| <i>ZMYND8</i>              | ACTATATGAAGCAGCCACTC          | TCTCACATTCAGGACAAAAC          |
| <i>ZNF189</i>              | TCTCACTGGATGTTTTGAAC          | GAAATTGAGGAAGAAGTGGA          |
| <i>ZNF326</i>              | CTGCATCTGGAAAGTTCTTC          | TACTCATGCAAAAACCTCC           |

**ZNF189 DNA gblock sequence:**

ctgtctgtagctagegccaccATGGCATCACCATCTCCTCCACCTGAATCAAAGGACTGTTGA  
CTTTTGAGGACGTAGCGGTCTTCTTTACTCAAGAAGAATGGGACTATTTGGACCCAG  
CTCAAAGGTCTCTTTACAAAGATGTGATGATGGAAAACCTATGGGAACCTCGTTTCAC  
TTGACGTAACAGGGATAAAGATGAGGAGCCTACCGTTAAACAGGAGATCGAG  
GAGATTGAAGAGGAGGTAGAACCACAGGGTGTAAATTGTAACACGCATCAAAGCGA  
AATCGACCAGGACCCCATGGGTCGCGAGACATTTGAACTCGTGGGAAGACTCGACA  
AACAAAGAGGGATTTTCTTGTGGGAAATCCCCGGGAAAGCCTGACTCAGGAACAG  
CGAATGTTTAGGGAGAATACAAATATCATTAGGAAGAGGCCTAATAGTGAGGAGAA  
GTGTCATAAATGCGAGGAATGTGGGAAAGGATTCGTAAGAAAAGCGCATTTTATCC  
AGCATCAGAGGGTCCACACCGGAGAAAAACCTTTTCAGTGTAACGAATGCGGAAAA  
TCCTTTTCACGGAGTTCATTCGTAATAGAACACCAACGCATTCATACCGGGGAGAGG  
CCATATGAGTGTAATTATTGCGGCAAGACGTTTTTCTGTTTCTTCAACATTGATACGGC  
ACCAAAGGATTCACACCGGCGAGCGGCCCTATCAATGTAACCAATGTAAGCAGTCA  
TTTTCTCAGCGCAGGAGCCTTGTTAAGCATCAGAGAATACACACCGGCGAAAAACC  
GCATAAATGTTTCAGACTGTGGAAAGGCTTTCAGTTGGAAGTCCCATCTTATCGAACA  
TCAGCGGACTCACACGGGCGAGAAGCCGTACCACTGCACGAAGTGCAAGAAGAGCT  
TTTCTCGCAACAGTTTGTCTCGTGGAGCATCAACGAATCCACACAGGTGAGCGGCCCC  
ACAAATGTGGGAATGCGGGAAAGCTTTCGGGCTTAGCACGTATCTCATTACAGCACC  
AAAAAATCCATACGGGAGAGAAACCCTTCTTGTGCATAGAATGCGGAAAGTCCTTT  
AGCCGGTCCAGTTTTCTGATAGAGCATCAGCGGATACATACTGGTGAAAGGCCTTAC  
CAATGCAAGGAGTGTGGAAAAAGCTTTAGTCAACTGTGCAACTTGACCCGACACCA  
GAGGATTCACACAGGTGATAAACCACATAAGTGCGAAGAATGCGGAAAAGCTTTTA  
GCCGATCTTCCGGCCTGATCCAACATCAGAGAATCCACACGCGAGAGAAGACATAC  
CCGTACAATGAACTAAAGAATCTTTTGATCCGAATTGTTCCCTCGTTATCCAACAA  
GAGGTGTACCCCAAGGAGAAGTCTTATAAGTGCGATGAGTGTGGAAAGACATTTAG  
TGTATCTGCTCATCTCGTACAGCACCAACGAATCCACACTGGGGAAAAACCCTATCT  
CTGCACTGTCTGCGGGAAGTCATTCTCACGATCCTCTTTTCTTATTGAACACCAGCGC  
ATTCACACGGGTGAGCGGCCGTATTTGTGCCGGCAGTGCGGGAAGAGCTTCTCCAG  
TTGTGCAATCTTATTCGGCATCAGGGCGTGCACACGGGGAATAAGCCCCACAAGTGT  
GACGAATGTGGAAAAGCGTTCAGTCGAACTCAGGCCTCATTCAACACCAGCGAAT  
CCATACAGGAGAGAAACCGTATAAGTGTGAGAAATGCGATAAATCCTTCAGCCAAC  
AACGCAGCCTGGTTAATCATCAGAAGATACACGCAGAAGTGAAGACCCAAGAAACG  
CATGAATGTGACGCTTGCGGGGAGGCCTTTAACTGTAGGATATCTTTGATTACGCAT  
CAAAAATTGCATACAGCTTGGATGCAATAGggatcctgtctgata

**T7 ARCA forward primer:**

TAATACGACTCACTATAGGGTAGCGCCACCATGGCATC

**Reverse primer:**

GGATCCCTATTGCATCCAAGCTG

Primer sequences for qPCR assays and gblock sequence/primers for mRNA overexpression.
